# Supplementary material for: Differentiation of multiple system atrophy from Parkinson’s disease by structural connectivity derived from probabilistic tractography
Source: PubMed Central journal article supplement (PMC6848175; doi:10.1038/s41598-019-52829-8), 2019-11-11
Supplement: 41598_2019_52829_MOESM1_ESM.pdf [file 41598_2019_52829_MOESM1_ESM.pdf]

## **Supplementary data**

### **Differentiation of multiple system atrophy from Parkinson's disease by structural connectivity derived from probabilistic tractography**

Alexandra Abos<sup>1</sup>, Hugo C. Baggio<sup>1</sup>, Barbara Segura<sup>1</sup>, Anna Campabadal<sup>1</sup>, Carme Uribe<sup>1</sup>, Darly M Giraldo<sup>2,3</sup>, Alexandra Perez-Soriano<sup>2,3</sup>, Esteban Muñoz<sup>2,3</sup>, Yaroslau Compta<sup>2,3</sup>, Carme Junque<sup>1,2,4</sup>, Maria Jose Marti<sup>2,3</sup>

<sup>1</sup>Medical Psychology Unit, Department of Medicine. Institute of Neuroscience, University of Barcelona. Barcelona, Catalonia, Spain.

<sup>2</sup>Centro de Investigación Biomédica en Red sobre Enfermedades Neurodegenerativas (CIBERNED), Hospital Clínic de Barcelona. Barcelona, Catalonia, Spain.

<sup>3</sup>Movement Disorders Unit, Neurology Service, Hospital Clínic de Barcelona. Institute of Neuroscience, University of Barcelona, Barcelona, Catalonia, Spain.

<sup>4</sup> Institute of Biomedical Research August Pi i Sunyer (IDIBAPS). Barcelona, Catalonia, Spain.

**\*Corresponding author:** Dr. Maria Jose Marti

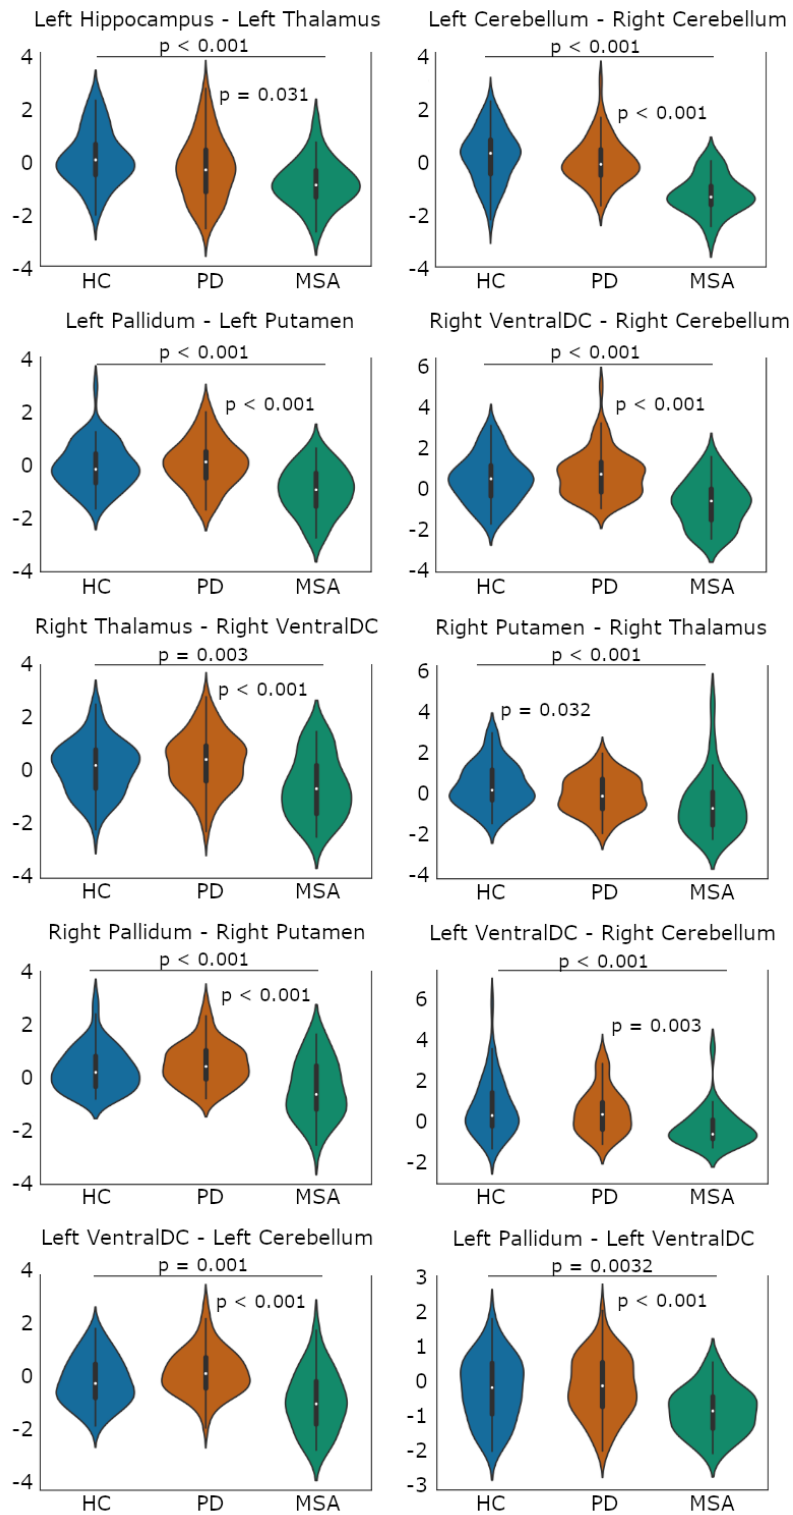

Supplementary figure 1. Plot illustrates the distribution of the number of streamlines (NOS) between the 10 significantly reduced tracts found in MSA patients using threshold-free network based statistics (TFNBS). NOS values were Z-transformed; HC: healthy controls; PD: Parkinson's disease group; MSA: multiple system atrophy group.

Supplementary Table 1. Sociodemographic and clinical parameters by group of the balanced sample of PD and MSA patients used for the classification procedure.

|                            | <b>PD (n=31)</b> | <b>MSA (n=31)</b> | <b>Stat/ p</b> |
|----------------------------|------------------|-------------------|----------------|
| <b>Age</b>                 | 64.55 (8.3)      | 60.9 (8.4)        | 1.70/p=.1969   |
| <b>Years of education</b>  | 11.58 (5.4)      | 10.68 (3.8)       | 0.76/p=.7203   |
| <b>Sex (male/female)</b>   | 21/10            | 19/12             | 0.52/p=.8223   |
| <b>Years of evolution</b>  | 10.39 (6.55)     | 4.46 (2.75)       | 4.64/p<.001*   |
| <b>H&amp;Y (1:2:3:4:5)</b> | 5:15:11:0:0      | 0:8:11:9:3        | 4.84/p<.001*   |
| <b>LEDD</b>                | 629.07 (414.1)   | 520.67 (426.4)    | 0.9902/p=.1692 |

PD: Parkinson's disease patient group; MSA: multiple system atrophy patient group; H&Y: Hoehn and Yahr scale; LEDD: levodopa equivalent daily dose (in mg); \* refers to significant results; Post-hoc differences between HC and PD<sup>1</sup>; HC and MSA<sup>2</sup>; PD and MSA<sup>3</sup>;

Supplementary Table 2. Fractional Anisotropy (FA) of subcortical ROIs by group.

|                          | <b>HC (n=54)</b> | <b>PD (n=65)</b> | <b>MSA (n=31)</b> | <b>Stat/ p</b>                       |
|--------------------------|------------------|------------------|-------------------|--------------------------------------|
| <b>Left Accumbens</b>    | 0.2737 (0.020)   | 0.2705 (0.023)   | 0.2756 (0.021)    | F=1.5978/ p=0.2618                   |
| <b>Left Amygdala</b>     | 0.2585 (0.019)   | 0.2535 (0.020)   | 0.2689 (0.029)    | F=5.6173/ p=0.0144* <sup>2,3</sup>   |
| <b>Left Caudate</b>      | 0.2865 (0.023)   | 0.2929 (0.027)   | 0.2987 (0.034)    | F=2.0163/ p=0.2529                   |
| <b>Left Hippocampus</b>  | 0.2596 (0.021)   | 0.2525 (0.023)   | 0.2512 (0.022)    | F=1.8303/ p=0.2598                   |
| <b>Left Pallidum</b>     | 0.4283 (0.042)   | 0.4303 (0.042)   | 0.4359 (0.038)    | F=0.4489/ p=0.6749                   |
| <b>Left Putamen</b>      | 0.3771(0.027)    | 0.3728 (0.023)   | 0.3796 (0.024)    | F=1.7513/ p=0.2598                   |
| <b>Left Thalamus</b>     | 0.3768 (0.020)   | 0.3816 (0.022)   | 0.3775 (0.022)    | F=0.3641/ p=0.6929                   |
| <b>Left Ventral DC</b>   | 0.4327 (0.024)   | 0.4279 (0.029)   | 0.4116 (0.027)    | F=7.1122/ p=0.004* <sup>2,3</sup>    |
| <b>Left Cerebellum</b>   | 0.2894 (0.027)   | 0.2878 (0.021)   | 0.2896 (0.033)    | F=0.5908/ p=0.6311                   |
| <b>Right Accumbens</b>   | 0.2490 (0.021)   | 0.2421 (0.018)   | 0.2523 (0.024)    | F=3.8997/ p=0.0537                   |
| <b>Right Amygdala</b>    | 0.2733 (0.023)   | 0.2753 (0.029)   | 0.2843 (0.040)    | F=1.4372/ p=0.2896                   |
| <b>Right Caudate</b>     | 0.2593 (0.022)   | 0.2503 (0.022)   | 0.2560 (0.028)    | F=1.9789/ p=0.2529                   |
| <b>Right Hippocampus</b> | 0.4100 (0.041)   | 0.4053 (0.037)   | 0.4291(0.047)     | F=4.1309/ p=0.0516                   |
| <b>Right Pallidum</b>    | 0.3710 (0.021)   | 0.3679 (0.021)   | 0.3757 (0.028)    | F=1.9794/ p=0.2529                   |
| <b>Right Putamen</b>     | 0.3756 (0.018)   | 0.3776 (0.021)   | 0.3696 (0.023)    | F=1.6627/ p=0.2618                   |
| <b>Right Thalamus</b>    | 0.4218 (0.024)   | 0.4155 (0.025)   | 0.3997 (0.026)    | F=9.7117/ p=0.0018* <sup>1,2,3</sup> |
| <b>Right Ventral DC</b>  | 0.4731 (0.033)   | 0.4766 (0.037)   | 0.4462 (0.030)    | F=9.1112/ p=0.0024* <sup>2,3</sup>   |
| <b>Right Cerebellum</b>  | 0.3351 (0.026)   | 0.3357 (0.020)   | 0.2884 (0.041)    | F=37.0711/ p=0.0018* <sup>2,3</sup>  |

HC: healthy controls; PD: Parkinson's disease patient group; MSA: multiple system atrophy patient group; \* refers to FDR corrected results; Post-hoc differences between HC and PD<sup>1</sup>; HC and MSA<sup>2</sup>; PD and MSA<sup>3</sup>; Stats refers to F-test (F).

Supplementary Table 3. Mean Diffusivity (MD) of subcortical ROIs by group.

|                          | HC (n=54)                                      | PD (n=65)                                      | MSA (n=31)                                     | Stat/ p                             |
|--------------------------|------------------------------------------------|------------------------------------------------|------------------------------------------------|-------------------------------------|
| <b>Left Accumbens</b>    | 8.755·10 <sup>-4</sup> (5.5·10 <sup>-5</sup> ) | 9.095·10 <sup>-4</sup> (6.7·10 <sup>-5</sup> ) | 9.213·10 <sup>-4</sup> (7.7·10 <sup>-5</sup> ) | F=4.5752/ p=0.0354* <sup>1,2</sup>  |
| <b>Left Amygdala</b>     | 9.838·10 <sup>-4</sup> (8.3·10 <sup>-5</sup> ) | 9.890·10 <sup>-4</sup> (9.3·10 <sup>-5</sup> ) | 9.521·10 <sup>-4</sup> (5.9·10 <sup>-5</sup> ) | F=2.1035/ p=0.2153                  |
| <b>Left Caudate</b>      | 1.262·10 <sup>-3</sup> (1.2·10 <sup>-4</sup> ) | 1.265·10 <sup>-3</sup> (1·10 <sup>-4</sup> )   | 1.256·10 <sup>-3</sup> (9·10 <sup>-5</sup> )   | F=0.2476/ p=0.8758                  |
| <b>Left Hippocampus</b>  | 1.144·10 <sup>-3</sup> (9.8·10 <sup>-5</sup> ) | 1.192·10 <sup>-3</sup> (1.1·10 <sup>-4</sup> ) | 1.181·10 <sup>-3</sup> (9·10 <sup>-5</sup> )   | F=2.179/ p=0.2153                   |
| <b>Left Pallidum</b>     | 7.674·10 <sup>-4</sup> (6.8·10 <sup>-5</sup> ) | 7.688·10 <sup>-4</sup> (6.8·10 <sup>-5</sup> ) | 7.664·10 <sup>-4</sup> (7.2·10 <sup>-5</sup> ) | F=0.4114/ p=0.8082                  |
| <b>Left Putamen</b>      | 7.739·10 <sup>-4</sup> (4.5·10 <sup>-5</sup> ) | 7.914·10 <sup>-4</sup> (4.9·10 <sup>-5</sup> ) | 8.161·10 <sup>-4</sup> (7.8·10 <sup>-5</sup> ) | F=6.9336/ p=0.009* <sup>1,2,3</sup> |
| <b>Left Thalamus</b>     | 1.057·10 <sup>-3</sup> (5.9·10 <sup>-5</sup> ) | 1.061·10 <sup>-3</sup> (6.4·10 <sup>-5</sup> ) | 1.062·10 <sup>-3</sup> (6.4·10 <sup>-5</sup> ) | F=0.0322/ p=0.9711                  |
| <b>Left Ventral DC</b>   | 1.206·10 <sup>-3</sup> (9.9·10 <sup>-5</sup> ) | 1.232·10 <sup>-3</sup> (1.1·10 <sup>-4</sup> ) | 1.313·10 <sup>-3</sup> (1·10 <sup>-4</sup> )   | F=10.3436/ p=0.0012* <sup>2,3</sup> |
| <b>Left Cerebellum</b>   | 8.4·10 <sup>-4</sup> (4.8·10 <sup>-5</sup> )   | 8.647·10 <sup>-4</sup> (5.2·10 <sup>-5</sup> ) | 8.531·10 <sup>-4</sup> (4.8·10 <sup>-5</sup> ) | F=3.2145/ p=0.1098                  |
| <b>Right Accumbens</b>   | 9.816·10 <sup>-4</sup> (6.8·10 <sup>-5</sup> ) | 9.964·10 <sup>-4</sup> (7.7·10 <sup>-5</sup> ) | 9.924·10 <sup>-4</sup> (8.1·10 <sup>-5</sup> ) | F=0.6145/ p=0.7417                  |
| <b>Right Amygdala</b>    | 1.274·10 <sup>-3</sup> (1.2·10 <sup>-4</sup> ) | 1.288·10 <sup>-3</sup> (1.1·10 <sup>-4</sup> ) | 1.292·10 <sup>-3</sup> (9·10 <sup>-5</sup> )   | F=0.162/ p=0.8974                   |
| <b>Right Caudate</b>     | 1.154·10 <sup>-3</sup> (9.6·10 <sup>-5</sup> ) | 1.2·10 <sup>-3</sup> (1.1·10 <sup>-4</sup> )   | 1.192·10 <sup>-3</sup> (9.9·10 <sup>-5</sup> ) | F=2.0399/ p=0.2232                  |
| <b>Right Hippocampus</b> | 7.888·10 <sup>-4</sup> (7.8·10 <sup>-5</sup> ) | 7.878·10 <sup>-4</sup> (6.8·10 <sup>-5</sup> ) | 7.786·10 <sup>-4</sup> (9·10 <sup>-5</sup> )   | F=0.4367/ p=0.8082                  |
| <b>Right Pallidum</b>    | 7.725·10 <sup>-4</sup> (4.3·10 <sup>-5</sup> ) | 7.794·10 <sup>-4</sup> (4.5·10 <sup>-5</sup> ) | 8.084·10 <sup>-4</sup> (7.9·10 <sup>-5</sup> ) | F=5.2247/ p=0.0212* <sup>2,3</sup>  |
| <b>Right Putamen</b>     | 1.077·10 <sup>-3</sup> (6.8·10 <sup>-5</sup> ) | 1.084·10 <sup>-3</sup> (6.3·10 <sup>-5</sup> ) | 1.101·10 <sup>-3</sup> (5.4·10 <sup>-5</sup> ) | F=1.4494/ p=0.3609                  |
| <b>Right Thalamus</b>    | 1.24810 <sup>-3</sup> (1·10 <sup>-4</sup> )    | 1.271·10 <sup>-3</sup> (1.1·10 <sup>-4</sup> ) | 1.350·10 <sup>-3</sup> (1.1·10 <sup>-4</sup> ) | F=9.2948/ p=0.0012* <sup>2,3</sup>  |
| <b>Right Ventral DC</b>  | 9.019·10 <sup>-4</sup> (1·10 <sup>-4</sup> )   | 9.047·10 <sup>-4</sup> (1.1·10 <sup>-4</sup> ) | 9.6·10 <sup>-4</sup> (1.1·10 <sup>-4</sup> )   | F=3.0339/ p=0.1222                  |
| <b>Right Cerebellum</b>  | 9.187·10 <sup>-4</sup> (7.5·10 <sup>-5</sup> ) | 9.162·10 <sup>-4</sup> (7.1·10 <sup>-5</sup> ) | 1.141·10 <sup>-3</sup> (1.9·10 <sup>-4</sup> ) | F=55.287/ p=0.0012* <sup>2,3</sup>  |

HC: healthy controls; PD: Parkinson's disease patient group; MSA: multiple system atrophy patient group; \* refers to FDR corrected results; Post-hoc differences between HC and PD<sup>1</sup>; HC and MSA<sup>2</sup>; PD and MSA<sup>3</sup>; Stats refers to F-test (F).

Supplementary Table 4. Volumetric measures (mm<sup>3</sup>) of subcortical ROIs by group.

|                          | HC (n=54)          | PD (n=65)          | MSA (n=31)         | Stat/ p                         |
|--------------------------|--------------------|--------------------|--------------------|---------------------------------|
| <b>Left Accumbens</b>    | 525.80 (102.4)     | 495.08 (110.5)     | 446.84 (128)       | F=6.313/p=.0038* <sup>1,2</sup> |
| <b>Left Amygdala</b>     | 1588.57 (227.66)   | 1540.45 (304.28)   | 1464.26 (225)      | F=4.751/p=.0171* <sup>1,2</sup> |
| <b>Left Caudate</b>      | 3345.61 (419.37)   | 3403.82 (528.38)   | 3065.97 (569.47)   | F=4.894/p=.0102* <sup>2,3</sup> |
| <b>Left Hippocampus</b>  | 4055.56 (450.62)   | 3992.66 (627.99)   | 3692.87 (443.2)    | F=6.018/p=.0038* <sup>2,3</sup> |
| <b>Left Pallidum</b>     | 1653.59 (228.69)   | 1771.55 (278.02)   | 1374.03 (285.88)   | F=24.226/p<.001* <sup>2,3</sup> |
| <b>Left Putamen</b>      | 5048.76 (565.34)   | 5013.09 (767.11)   | 4140.52 (1121.98)  | F=17.326/p<.001* <sup>2,3</sup> |
| <b>Left Thalamus</b>     | 6360.06 (640.82)   | 6643.49 (837.85)   | 6218.10 (710.86)   | F=2.96/p=.0542                  |
| <b>Left Ventral DC</b>   | 3939.56 (448.72)   | 4179.68 (531)      | 3520.13 (500.58)   | F=19.789/p<.001* <sup>2,3</sup> |
| <b>Left Cerebellum</b>   | 16474.33 (3715.37) | 16862.20 (3434.69) | 10286.74 (4016.76) | F=37.516/p<.001* <sup>2,3</sup> |
| <b>Right Accumbens</b>   | 577.06 (100.18)    | 534.75 (120.49)    | 485.29 (119.62)    | F=8.402/p<.001* <sup>1,2</sup>  |
| <b>Right Amygdala</b>    | 1637.39 (237.647)  | 1610.12 (290.03)   | 1516.35 (226.07)   | F=3.497/p=.0325* <sup>2</sup>   |
| <b>Right Caudate</b>     | 3395.69 (464.35)   | 3469.09 (469.16)   | 3153.16 (570.51)   | F=3.520/p=.0181* <sup>2,3</sup> |
| <b>Right Hippocampus</b> | 4128.78 (514.57)   | 4100.46 (650.54)   | 3749.94 (708.31)   | F=5.081/p=.0093* <sup>2,3</sup> |
| <b>Right Pallidum</b>    | 1445.26 (183.75)   | 1583.4 (218.16)    | 1301.19 (272.39)   | F=16.732/p<.001* <sup>2,3</sup> |
| <b>Right Putamen</b>     | 4725.56 (536.36)   | 4597.25 (682.25)   | 3883.06 (1030.05)  | F=16.800/p<.001* <sup>2,3</sup> |
| <b>Right Thalamus</b>    | 6539.22 (649.56)   | 6815.18 (885.91)   | 6306.74 (727.66)   | F=3.767/p=0.0292* <sup>3</sup>  |
| <b>Right Ventral DC</b>  | 3742.09 (405.7)    | 3949.57 (534.02)   | 3493.42 (495.49)   | F=8.911/p<.001* <sup>2,3</sup>  |
| <b>Right Cerebellum</b>  | 15846.09 (2840.33) | 16190.62 (3031.55) | 9200.06 (3487.57)  | F=60.91/p<.001* <sup>2,3</sup>  |

HC: healthy controls; PD: Parkinson's disease patient group; MSA: multiple system atrophy patient group; \* refers to FDR corrected results; Post-hoc differences between HC and PD<sup>1</sup>; HC and MSA<sup>2</sup>; PD and MSA<sup>3</sup>; Stats refers to F-test (F).
